# Supplementary material for: Insertion Hot Spots of DIRS1 Retrotransposon and Chromosomal Diversifications among the Antarctic Teleosts Nototheniidae
Source: MDPI journal article supplement (doi:10.3390/ijms20030701), 2019-02-06
Supplement: s1 [file s1]

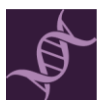

# Insertion Hot Spots of *DIRS1* Retrotransposon and Chromosomal Diversifications Among the Antarctic Teleosts Nototheniidae

## Supplementary materials

**Table S1.** TE intrafamily conservation for *YNoto*, *GyNoto*, and *CoNoto* sequences within and across distinct nototheniid sub-families. Complement of Table 1. Nucleotide identity percentages.

| <i>YNoto B-R-J-V</i> | Trem        | Pleu       | Noto        | Diss       | Chan        | Cygn       | Gymn      | Arte        | Gobi      |
|----------------------|-------------|------------|-------------|------------|-------------|------------|-----------|-------------|-----------|
| Trem                 | 93-95-93-92 | 85-x-85-91 | 86-87-88-87 | x-90-79-89 | 87-86-89-89 | 87-89-90-x | x-88-x-91 | 88-89-89-87 | x-x-89-89 |
| Pleu                 |             | x-x-x-x    | 87-x-88-87  | x-x-76-90  | 85-x-84-89  | 88-x-85-x  | x-x-x-90  | 86-x-84-89  | x-x-84-87 |
| Noto                 |             |            | 87-91-88-84 | x-94-86-87 | 84-88-87-86 | 85-91-89-x | x-90-x-85 | 86-92-90-89 | x-x-90-89 |
| Diss                 |             |            |             | x-x-x-x    | x-89-78-88  | x-92-80-x  | 91-x-88-x | x-93-78-89  | x-x-78-86 |
| Chan                 |             |            |             |            | x-x-87-86   | 91-93-90-x | x-92-x-89 | 95-94-89-90 | x-x-88-85 |
| Cygn                 |             |            |             |            |             | x-x-x-x    | x-95-x-x  | 93-96-91-x  | x-x-91-x  |
| Gymn                 |             |            |             |            |             |            | x-x-x-x   | x-98-x-86   | x-x-x-86  |
| Arte                 |             |            |             |            |             |            |           | x-95-95-97  | x-x-93-86 |
| Gobi                 |             |            |             |            |             |            |           |             | x-x-x-x   |

The first table represents *YNoto* in the following order: *YNotoB*, *R*, *J*, *V*.

| <i>GyNoto</i><br>A-B-E-F-<br>H | Trem                                | Pleu                      | Noto                                | Diss                                | Chan                                | Cygn                               | Gymn                              | Arte                               | Gobi                          |
|--------------------------------|-------------------------------------|---------------------------|-------------------------------------|-------------------------------------|-------------------------------------|------------------------------------|-----------------------------------|------------------------------------|-------------------------------|
| Trem                           | 96/96-<br>86/86-<br>97/97-97-<br>97 | x/x-<br>90/90-<br>x/x-x-x | 95/90-<br>86/88-<br>94/94-94-<br>95 | 94/93-<br>87/86-<br>95/97-96-<br>89 | 93/94-<br>88/86-<br>95/96-96-<br>92 | 94/91-<br>90/x-<br>94/96-96-<br>95 | x/x-<br>85/84-<br>96/95-95-<br>95 | 95/95-86-<br>95/96-95-<br>94       | 93/92-<br>91/89-<br>x/x-x-x   |
| Pleu                           |                                     | x/x-x/x-<br>x/x-x-x       | x/x-<br>85/92-<br>x/x-x-x           | x/x-<br>84/85-<br>x/x-x-x           | x/x-<br>89/89-<br>x/x-x-x           | x/x-95/x-<br>x/x-x-x               | x/x-<br>82/82-<br>x/x-x-x         | x/x-83-<br>x/x-x-x                 | x/x-<br>96/97-<br>x/x-x-x     |
| Noto                           |                                     |                           | x/88-<br>83/88-<br>94/94-94-<br>95  | 95/90-<br>87/85-<br>93/94-94-<br>89 | 94/91-<br>87/87-<br>95/95-95-<br>93 | 94/87-<br>86/x-<br>94/95-95-<br>96 | x/x-<br>87/84-95-<br>94-94-96     | 97/92-87-<br>95/95-94-<br>95       | 94/89-<br>87/92-<br>x/x-x-x   |
| Diss                           |                                     |                           |                                     | x/x-x/x-<br>x/x-x-x                 | 94/93-<br>88/85-<br>94/96-96-<br>91 | 97/87-<br>84/x-<br>94/96-97-<br>89 | x/x-91-<br>89-95/96-<br>96-89     | 95/95-91-<br>94/96-95-<br>88       | 93/93-<br>85/84-<br>x/x-x-x-x |
| Chan                           |                                     |                           |                                     |                                     | 95/97-<br>83/83-<br>97/98-99-<br>92 | 92/94-<br>89/x-<br>96/97-98-<br>94 | x/x-<br>88/84-<br>97/96-97-<br>94 | 95/97-88-<br>96/97-97-<br>93       | 93/93-<br>90/89-<br>x/x-x-x   |
| Cygn                           |                                     |                           |                                     |                                     |                                     | x/x-x/x-<br>x/x-x-x                | x/x-83/x-<br>96/96-97-<br>98      | 94/92-<br>84/x-<br>95/97-97-<br>97 | 92/90-<br>96/x-x/x-<br>x-x    |
| Gymn                           |                                     |                           |                                     |                                     |                                     |                                    | x/x-x/x-<br>x/x-x-x               | x/x-97-<br>97/96-96-<br>97         | x/x-<br>84/82-<br>x/x-x-x     |
| Arte                           |                                     |                           |                                     |                                     |                                     |                                    |                                   | 99/98-<br>x/x-x/x-<br>x-96         | 94/94-<br>84/85-<br>96/97-x-x |
| Gobi                           |                                     |                           |                                     |                                     |                                     |                                    |                                   |                                    | x/x-x/x-<br>x/x-x-x           |

The second table represents the *GyNoto* in the following order *GyNotoA*, *B*, *E*, *F*, *H*.

| <i>CoNoto A-B</i> | Trem | Pleu | Noto  | Diss  | Chan | Cygn | Gymn  | Arte  | Gobi |
|-------------------|------|------|-------|-------|------|------|-------|-------|------|
| Trem              | x-96 | x-95 | x-96  | x-92  | x-x  | x-x  | x-97  | x-88  | x-x  |
| Pleu              |      | x-x  | x-96  | x-92  | x-x  | x-x  | x-97  | x-88  | x-x  |
| Noto              |      |      | 98-96 | 98-93 | 97-x | x-x  | 98-97 | 99-90 | 98-x |
| Diss              |      |      |       | x-x   | 97-x | x-x  | 98-93 | 99-87 | 98-x |
| Chan              |      |      |       |       | 96-x | x-x  | 97-x  | 97-x  | 96-x |
| Cygn              |      |      |       |       |      | x-x  | x-x   | x-x   | x-x  |
| Gymn              |      |      |       |       |      |      | x-x   | 98-90 | 98-x |
| Arte              |      |      |       |       |      |      |       | x-x   | 99-x |
| Gobi              |      |      |       |       |      |      |       |       | x-x  |

The third table represent the *CoNoto* in the following order: *CoNotoA* and *B*. RT/RH and Int portions of the *Gypsy* sequences were integrated in the same table for *GyNotoA*, *B*, and *E*. *GyNotoF* and *H* are spanning the Int portion. X: not applicable (when only one specimen per species or when specimen were removed because of alignment difficulties).

|                      | Intra-clade mean | Inter-clade mean |
|----------------------|------------------|------------------|
| <i>DIRS1</i>         | 90.7             | 88.3             |
| <i>Gypsy</i> (RT-RH) | 92.4             | 90.6             |
| <i>Gypsy</i> (Int)   | 94.3             | 91.5             |
| <i>Gypsy</i> total   | 93.5             | 91.1             |
| <i>Copia</i> GalEa   | 97.0             | 97.8             |
| <i>Copia</i> Hydra   | 96.0             | 95.6             |

The fourth table represents the intra vs inter-clade (nototheniid sub-family) mean identity percentages for each TE are presented in the last table.

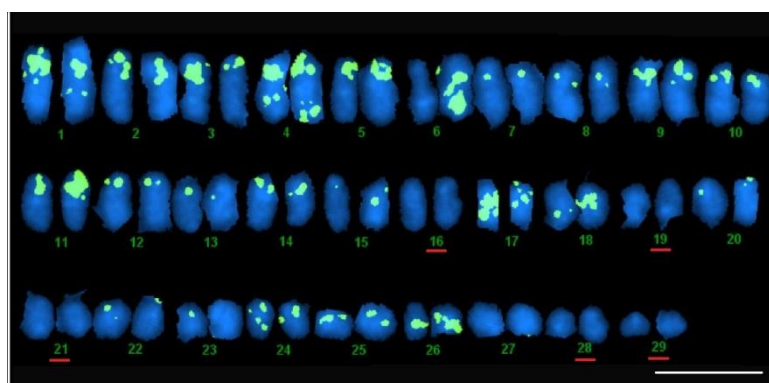

**Figure S2.** *YNotoJ* localized on chromosomes of *T. nicolai* ( $2n = 58$ ). *DIRS1* probe (corresponding to the *YNotoJ* family) was labeled with biotin and bound probe was detected with incubation with Avidin-FITC (fluorescein, greenish spots). Probe characteristics are indicated in Additional file 4. Chromosomal DNA was counterstained with DAPI. *DIRS1* forms multiple insertion hot spots preferentially located in centromeric/pericentromeric regions (giving a type 1 insertion pattern). The five chromosomal pairs where no *DIRS1* were observed are underlined in red. Scale bars: 10  $\mu\text{m}$ .

**Table S2.** Taxonomic sampling for tissues and chromosomal preparations used in this study.

| sub-family         | Genus, Species         | Sampling type | Field reference                                    | Locality and voucher reference (when applicable)                              |
|--------------------|------------------------|---------------|----------------------------------------------------|-------------------------------------------------------------------------------|
| Trematominae       | <i>T. eulepidotus</i>  | tissue        | si487n3152 <sup>5</sup>                            | Adelie Bank, Adelie Land margin, MNHN 2009-1358                               |
|                    |                        | chromosomes   | CE2381 <sup>7</sup>                                |                                                                               |
|                    | <i>T. nicolai</i>      | tissue        | TNB214 <sup>1</sup>                                | Adelie Bank, Adelie Land margin                                               |
|                    |                        | chromosomes   | CE5684REVO856 <sup>7</sup>                         |                                                                               |
|                    | <i>T. bernacchii</i>   | tissue        | si352n2561 <sup>5</sup><br>TA337TRBE <sup>74</sup> | Adelie Bank, Adelie Land margin, MNHN 2009-1312                               |
|                    |                        | chromosomes   | REVO2009-10 214-2738 <sup>7</sup>                  |                                                                               |
|                    | <i>L. nudifrons</i>    | tissue        | ICEFISH2005SR <sup>2</sup>                         | Shag rocks, South Atlantic                                                    |
|                    | <i>L. larseni</i>      | tissue        | ICEFISH2004SR <sup>2</sup>                         | Shag rocks, South Atlantic                                                    |
| Pleuragramminae    | <i>P. antarctica</i>   | tissue        | si394n2707 <sup>5</sup>                            | Adelie Basin, Adelie Land margin, MNHN 2009-1332                              |
|                    |                        |               |                                                    |                                                                               |
| Nototheniinae      | <i>N. coriiceps</i>    | tissue        | TA421NOCO8 <sup>4</sup>                            | Adelie Bank, Adelie Land margin, MNHN 2008-1884                               |
|                    |                        | chromosomes   | TA449 <sup>4</sup>                                 |                                                                               |
|                    | <i>N. angustata</i>    | tissue        | Nang1                                              | Southern New Zealand                                                          |
|                    | <i>N. rossi</i>        | tissue        | ICEFISH2004SG <sup>2</sup>                         | South Georgia                                                                 |
|                    | <i>P. magellanica</i>  | tissue        | Aus29 <sup>6</sup>                                 | Kerguelen Plateau, MNHN 2007-1843                                             |
| Dissostichinae     | <i>D. mawsoni</i>      | tissue        | REVO759 <sup>7</sup>                               | Adelie Bank, Adelie Land margin, MNHN 2001-1143                               |
| Channichthyinae    | <i>C. hamatus</i>      | tissue        | TNB235 <sup>1</sup>                                | Terra Nova Bay                                                                |
|                    |                        | chromosomes   | R60-II <sup>0</sup>                                |                                                                               |
|                    | <i>C. antarcticus</i>  | tissue        | TNB246 <sup>1</sup>                                | Terra Nova Bay                                                                |
|                    | <i>C. gunnari</i>      | tissue        | ICEFISH2004SR <sup>2</sup>                         | Shag rocks, South Atlantic                                                    |
| Cygnodraconinae    | <i>C. mawsoni</i>      | tissue        | TA53CYMA1 <sup>4</sup>                             | Adelie Basin, Adelie Land margin                                              |
| Gymnodraconinae    | <i>G. acuticeps</i>    | tissue        | TA109GYAC1 <sup>4</sup>                            | Adelie Bank, Adelie Land margin                                               |
| Artedidraconinae   | <i>P. scotti</i>       | tissue        | si238n1819 <sup>5</sup>                            | Mertz Bank, George V land coast, MNHN 2009-1389                               |
|                    |                        | tissue        | si283n978 <sup>5</sup>                             |                                                                               |
|                    | <i>H. velifer</i>      | chromosomes   | VLT44 <sup>3</sup>                                 | Adelie Bank, George V land margin/Coulman Island, MNHN 2009-0967 <sup>4</sup> |
| Gobionototheniinae | <i>G. gibberifrons</i> | tissue        | ICEFISH2004SR <sup>2</sup>                         | South Georgia                                                                 |

Tissue samples and chromosomal preparations were collected during the French, Italian, American, and International Antarctic campaigns: **TNB**<sup>0</sup> (1990/1991, Mario Zuchelli Station, Ross sea), **I.C.E.FISH**<sup>1</sup> (1999, Zuchelli Station, Ross sea), **ICE FISH**<sup>2</sup> (2004, Atlantic part of the Southern Ocean), **VLT**<sup>3</sup> (Victoria Land Transect, 2004, Ross Sea), **ICOTA**<sup>4</sup> (1996-2008, Adelie Land), **CEAMARC**<sup>5</sup> (2007/2008 north of Adélie Land and George V Land, Eastern Antarctica), **POKER**<sup>6</sup> (2010 and 2013 Kerguelen-Heard shelf), **REVOLTA**<sup>7</sup> (2010-2014, Adélie Land). TNB235, TNB246, TNB214, R60-II, VLT44 were collected by Eva Pisano in Ross sea and conserved in the National Italian Antarctic Museum (no voucher reference). Nang1 was collected by Chris Cheng in Southern New Zealand (no voucher reference). A single voucher reference is provided per species/locality. Other specimens are deposited in the MNHN research collections.

**Table S3.** Summary of TE probes used for FISH. For precisions (origin, survey), see Table S2 (taxonomic sampling).

| TEs          | Family                 | Sequence name  | Species related      | N° specimen for probes | Insert size (kb) |
|--------------|------------------------|----------------|----------------------|------------------------|------------------|
| <i>DIRS1</i> | <i>YNotoJ</i>          | <i>YChaJ</i>   | <i>C. hamatus</i>    | TNB235                 | 1.00             |
|              | <i>YNotoJ</i>          | <i>YHveJ</i>   | <i>H. velifer</i>    | si283n978              | 1.06             |
|              | <i>YNotoJ</i>          | <i>YGacuJ</i>  | <i>G. acuticeps</i>  | TA109                  | 1.19             |
|              | <i>YNotoJ</i>          | <i>YTbeJ</i>   | <i>T. bernacchii</i> | TA337TRBE7             | 1.10             |
| <i>Gypsy</i> | <i>GyNotoA</i>         | <i>GyGacA</i>  | <i>G. acuticeps</i>  | TA109                  | 1.54             |
|              | <i>GyNotoA</i>         | <i>GyChaA</i>  | <i>C. hamatus</i>    | TNB235                 | 1.53             |
|              | <i>GyNotoA</i>         | <i>GyHveA</i>  | <i>H. velifer</i>    | si283n978              | 1.43             |
| <i>Copia</i> | <i>CoNotoA (GalEa)</i> | <i>CoGacA</i>  | <i>G. acuticeps</i>  | TA109                  | 0.94             |
|              | <i>CoNotoA (GalEa)</i> | <i>CoPscA</i>  | <i>P. scotti</i>     | si238n1819             | 0.93             |
|              | <i>CoNotoB (Hydra)</i> | <i>CoHveB</i>  | <i>H. velifer</i>    | si283n978              | 1.37             |
|              | <i>CoNotoB (Hydra)</i> | <i>CoGacuB</i> | <i>G. acuticeps</i>  | TA109                  | 1.37             |
